# Supplementary material
Source: PubMed Central journal article supplement (PMC6411460)
Supplement: NIHMS1503938-supplement-3.pdf [file NIHMS1503938-supplement-3.pdf]

**Supplemental Table 1:**

|                                                                                 | High baseline Grp78<br>(n=9) | Low baseline<br>Grp78 (n= 25) |
|---------------------------------------------------------------------------------|------------------------------|-------------------------------|
| Median age at diagnosis (yrs)*                                                  | 8.7 (range 2-15)             | 12.5 (range 1-19)             |
| Median WBC count at diagnosis<br>(x10 <sup>3</sup> /UL); (absolute blast count) | 149 (55)                     | 121.8 (92)                    |
| High risk cytogenetics (pedi<br>AML)                                            | 2 (FLT3-ITD, -7)             | 1 (FLT3-ITD)                  |
| MRD negative at EOI                                                             | 4/9 = 44%                    | 16/25 = 64%                   |
| Vital status (alive)                                                            | 5/9 = 56%                    | 13/25 = 52%                   |
| Relapses (n, %)                                                                 | 4/9 = 44%                    | 13/25 = 52%                   |
| Median OS (weeks) ± SD                                                          | 150 ± 68.8                   | 123 ± 117.7                   |
| Median EFS (weeks) ± SD                                                         | 145 ± 80.5                   | 70 ± 114                      |

Supplemental Table 1: Patient characteristics and outcome in relation to UPR status. High and low baseline UPR was determined using by GRP78 status. Fisher's exact test was used for the categorical variables, and Mann-Whitney U-test was used for the continuous variables in the table.
